# Supplementary material
Source: PubMed Central journal article supplement (PMC3898665)
Supplement: NIHMS545161-supplement-1_si_001.pdf [file NIHMS545161-supplement-1_si_001.pdf]

**SUPPORTING INFORMATION**

**Enzyme Architecture: The Activating Oxydianion Binding Domain for Orotidine**

**5'-Monophosphate Decarboxylase.**

Krisztina Spong, Tina L. Amyes, and John P. Richard\*

*Department of Chemistry, University at Buffalo, Buffalo, New York 14260*

**Table S1.** Kinetic parameters for the turnover of **EO** by OMPDC in the presence of oxydianions at pH 7, 25 °C and  $I = 0.14$  maintained with NaCl.<sup>a</sup>

| Dianion<br>$X^{2-}$        | $[X^{2-}]$<br>mM | $(k_{cat}/K_m)_{obsd}$ <sup>b</sup><br>$M^{-1} s^{-1}$ | $K_d$ <sup>c</sup><br>mM | $(k_{cat}/K_m)_{E \cdot X}$ <sup>d</sup><br>$M^{-1} s^{-1}$ |
|----------------------------|------------------|--------------------------------------------------------|--------------------------|-------------------------------------------------------------|
| $HPO_3^{2-}$ <sup>e</sup>  | 2.5              | 30                                                     | 140                      | 1600                                                        |
|                            | 5.0              | 61                                                     |                          |                                                             |
|                            | 7.5              | 88                                                     |                          |                                                             |
|                            | 10               | 120                                                    |                          |                                                             |
|                            | 15               | 180                                                    |                          |                                                             |
|                            | 20               | 220                                                    |                          |                                                             |
|                            | 30               | 310                                                    |                          |                                                             |
|                            | 40               | 390                                                    |                          |                                                             |
| $HPO_4^{2-}$ <sup>f</sup>  | 8.4              | 0.043                                                  | 25                       | 0.11                                                        |
|                            | 17               | 0.056                                                  |                          |                                                             |
|                            | 34               | 0.070                                                  |                          |                                                             |
| $SO_3^{2-}$ <sup>g</sup>   | 2.2              | 66                                                     | 27                       | 920                                                         |
|                            | 4.4              | 120                                                    |                          |                                                             |
|                            | 8.9              | 230                                                    |                          |                                                             |
|                            | 18               | 370                                                    |                          |                                                             |
|                            | 25               | 450                                                    |                          |                                                             |
|                            | 36               | 520                                                    |                          |                                                             |
| $SO_4^{2-}$ <sup>h</sup>   | 2.3              | 0.13                                                   | 55                       | 3.1                                                         |
|                            | 5.1              | 0.28                                                   |                          |                                                             |
|                            | 7.4              | 0.38                                                   |                          |                                                             |
|                            | 10               | 0.47                                                   |                          |                                                             |
|                            | 15               | 0.65                                                   |                          |                                                             |
|                            | 20               | 0.86                                                   |                          |                                                             |
|                            | 30               | 1.1                                                    |                          |                                                             |
|                            | 42               | 1.3                                                    |                          |                                                             |
| $S_2O_3^{2-}$ <sup>i</sup> | 2.7              | 0.14                                                   | 14                       | 0.87                                                        |
|                            | 5.4              | 0.24                                                   |                          |                                                             |
|                            | 11               | 0.39                                                   |                          |                                                             |
|                            | 16               | 0.50                                                   |                          |                                                             |
|                            | 20               | 0.55                                                   |                          |                                                             |
|                            | 32               | 0.62                                                   |                          |                                                             |
|                            | 43               | 0.64                                                   |                          |                                                             |
| $AsO_4^{2-}$ <sup>j</sup>  | 33               | $1.1 \times 10^{-2}$                                   |                          |                                                             |
| $NO_3^{-}$ <sup>k</sup>    | 115              | $1.6 \times 10^{-2}$                                   |                          |                                                             |

<sup>a</sup> Reactions were monitored by UV spectroscopy at 283 nm ( $\text{HPO}_3^{2-}$ ,  $\text{SO}_3^{2-}$ ) or by HPLC (other anions), as described in earlier work.<sup>1,2</sup> <sup>b</sup> Observed second-order rate constant for turnover of EO by OMPDC at the specified concentration of  $\text{X}^{2-}$ . <sup>c</sup> Dissociation constant for binding of  $\text{X}^{2-}$  to the free enzyme. <sup>d</sup> Limiting second-order rate constant for turnover of EO by OMPDC that is saturated by  $\text{X}^{2-}$ . <sup>e</sup> Self-buffered at pH 7.0 by phosphite (80% free base). <sup>f</sup> Buffered at pH 7.1 by phosphate (70% free base) and 10 mM MOPS 50% free base. <sup>g</sup> Buffered at pH 7.1 by sulfite (70% free base) and 5 mM MOPS 53% free base. <sup>h</sup> Buffered at pH 7.1 by 5 mM MOPS 50% free base. <sup>i</sup> Buffered at pH 7.1 by 10 mM MOPS 50% free base. <sup>j</sup> Buffered at pH 7.1 by 25 mM MOPS 50% free base. <sup>k</sup> Buffered at pH 7.1 by 50 mM MOPS 50% free base.

### References

- (1) Toth, K.; Amyes, T. L.; Wood, B. M.; Chan, K. K.; Gerlt, J. A.; Richard, J. P.  
*Biochemistry* **2009**, *48*, 8006-8013.
- (2) Amyes, T. L.; Richard, J. P.; Tait, J. J. *J. Am. Chem. Soc.* **2005**, *127*, 15708-15709.
